# Supplementary material for: Dynamic and temporal assessment of human dried blood spot MS/MSALL shotgun lipidomics analysis
Source: PubMed Central journal article supplement (PMC5360027; doi:10.1186/s12986-017-0182-6), 2017-03-20
Supplement: 12986_2017_182_MOESM1_ESM.pdf [file 12986_2017_182_MOESM1_ESM.pdf]

**Supplemental Table 1. Internal standards for each lipid class**

| <b>Internal Standards<sup>a</sup></b> | <b>Concentration (nmol/ DBS spot)</b> |
|---------------------------------------|---------------------------------------|
| PC 14:1/14:1                          | 11.00                                 |
| LPC 17:0                              | 2.20                                  |
| PE 16:1/16:1                          | 0.55                                  |
| LPE 14:0                              | 0.11                                  |
| PG 15:0/15:0                          | 0.33                                  |
| PS 14:0/14:0                          | 0.33                                  |
| PA 12:0/12:0                          | 0.44                                  |
| TAG 17:1/17:1/17:1                    | 6.60                                  |
| DAG 17:1/17:1                         | 1.65                                  |
| SM 12:0                               | 1.10                                  |
| Cer 17:0                              | 0.066                                 |
| <sup>13</sup> C <sub>4</sub> -AC 16:0 | 0.011                                 |
| CBS 15:0                              | 0.025                                 |

<sup>a</sup> PC, phosphatidylcholine; PE, phosphatidylethanolamine; PS, phosphatidylserine; SM, sphingomyelin; PI, phosphatidylinositol; PG, phosphatidylglycerol; PA, phosphatidic acid; TAG, triacylglyceride; DAG, diacylglyceride; Cer, ceramide; AC, acylcarnitine; LPC, lysophosphatidylcholine; LPE, lysophosphatidylethanolamine; CBS, cerebroside.
