# Supplementary material for: Dynamic and temporal assessment of human dried blood spot MS/MSALL shotgun lipidomics analysis
Source: PubMed Central journal article supplement (PMC5360027; doi:10.1186/s12986-017-0182-6), 2017-03-20
Supplement: 12986_2017_182_MOESM2_ESM.pdf [file 12986_2017_182_MOESM2_ESM.pdf]

**Supplemental Table 2. Extraction method repeatability, recovery, and limit of quantification (LOQ) for each lipid internal standard added to DBS samples**

| Analyte <sup>a</sup>                   | Repeatability               |        | Recovery of added analytes <sup>b</sup> , % | LOQ (nM) <sup>c</sup> |
|----------------------------------------|-----------------------------|--------|---------------------------------------------|-----------------------|
|                                        | Peak Intensity <sup>b</sup> | CV (%) |                                             |                       |
| PC 14:1/14:1                           | 21753333 ± 555008           | 2.6    | 105.2 ± 2.7                                 | 0.16                  |
| PE 16:1/16:1                           | 884750 ± 23210              | 2.6    | 52.4 ± 1.4                                  | 0.81                  |
| LPE 14:0                               | 35220 ± 4256                | 12.1   | 47.6 ± 5.8                                  | 1.61                  |
| LPC 17:0                               | 6827833 ± 482250            | 7.1    | 78.0 ± 5.5                                  | 0.32                  |
| TAG 17:1/17:1/17:1                     | 12831667 ± 661331           | 5.2    | 104.8 ± 5.4                                 | 0.10                  |
| DAG 17:1/17:1                          | 1464167 ± 127033            | 6.4    | 51.7 ± 4.5                                  | 0.24                  |
| CBS 15:0                               | 61342 ± 4049                | 6.6    | 59.4 ± 3.9                                  | 0.37                  |
| SM 12:0                                | 44387 ± 3799                | 8.6    | 114.0 ± 9.8                                 | 0.16                  |
| <sup>13</sup> C <sub>4</sub> -AC -16:0 | 77268 ± 4157                | 5.4    | 70.3 ± 3.8                                  | 1.62                  |
| Cer 17:0                               | 197133 ± 15760              | 8.0    | 68.8 ± 5.5                                  | 0.97                  |
| PG 15:0/15:0                           | 1267200 ± 123808            | 10.1   | 96.1 ± 9.7                                  | 0.49                  |
| PS 14:0/14:0                           | 166300 ± 14012              | 8.4    | 117.1 ± 9.9                                 | 0.49                  |
| PA 12:0/12:0                           | 62825 ± 3185                | 5.1    | 55.3 ± 2.8                                  | 0.65                  |

<sup>a</sup> Abbreviations are the same as Supplemental Table 1.

<sup>b</sup> Data are presented as Mean ± SD (n=3)

<sup>c</sup> LOQ, limit of quantification
