# Supplementary material for: Dynamic and temporal assessment of human dried blood spot MS/MSALL shotgun lipidomics analysis
Source: PubMed Central journal article supplement (PMC5360027; doi:10.1186/s12986-017-0182-6), 2017-03-20

# Supplemental Figure 1

(A)

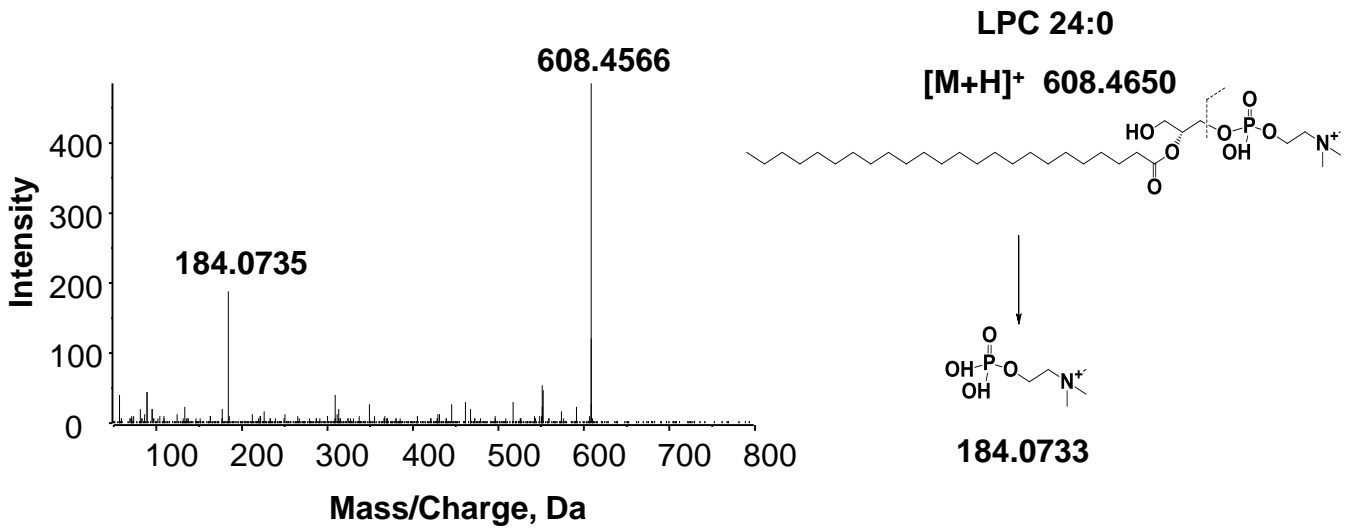

(B)

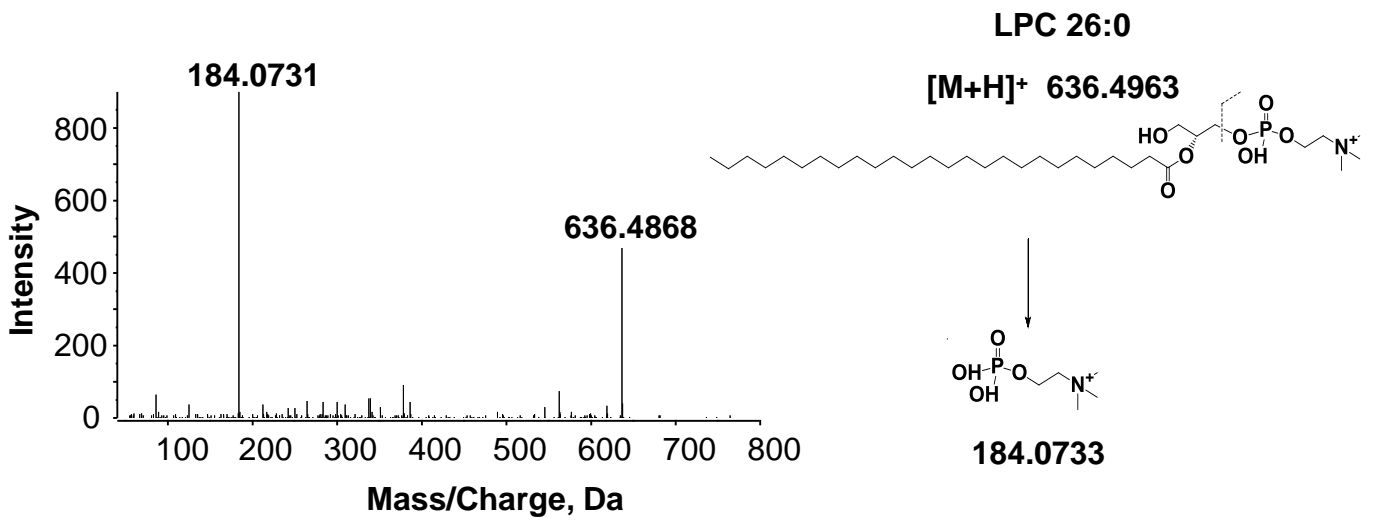

Supplement: 12986_2017_182_MOESM3_ESM.pdf [file 12986_2017_182_MOESM3_ESM.pdf]
